# Supplementary material
Source: MDPI journal article supplement (https://www.mdpi.com/2073-4344/6/12/213)
Supplement: s1 [file s1]

# Supplementary Materials: *P*-Stereogenic Phosphines for the Stabilisation of Metal Nanoparticles. A Surface State Study

Eva Raluy, Arnald Grabulosa, Pierre Lavedan, Christian Pradel, Guillermo Muller, Isabelle Favier and Montserrat Gómez

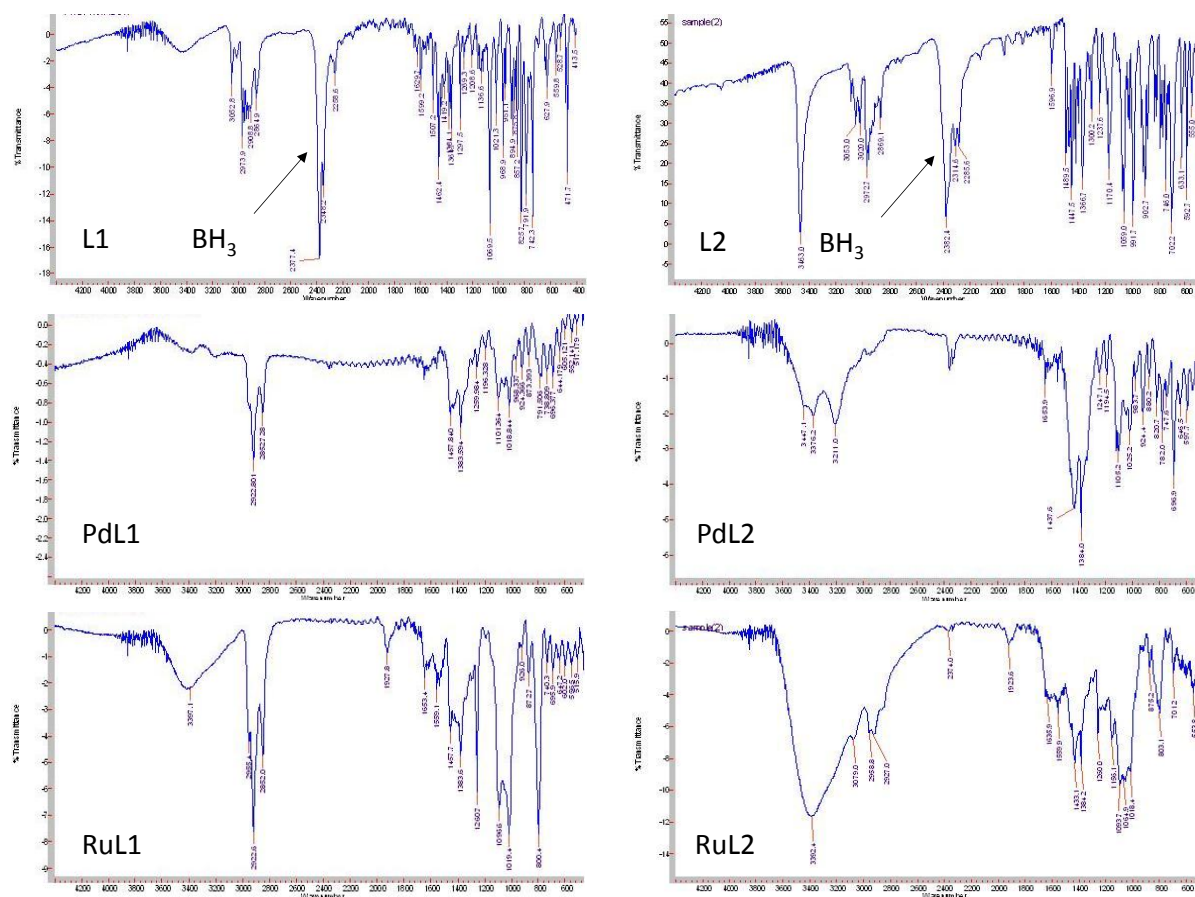

**Figure S1.** IR spectra (KBr pellets) of ligands L1 and L2 and the corresponding MNPs: PdL1, PdL2, RuL1 and RuL2.

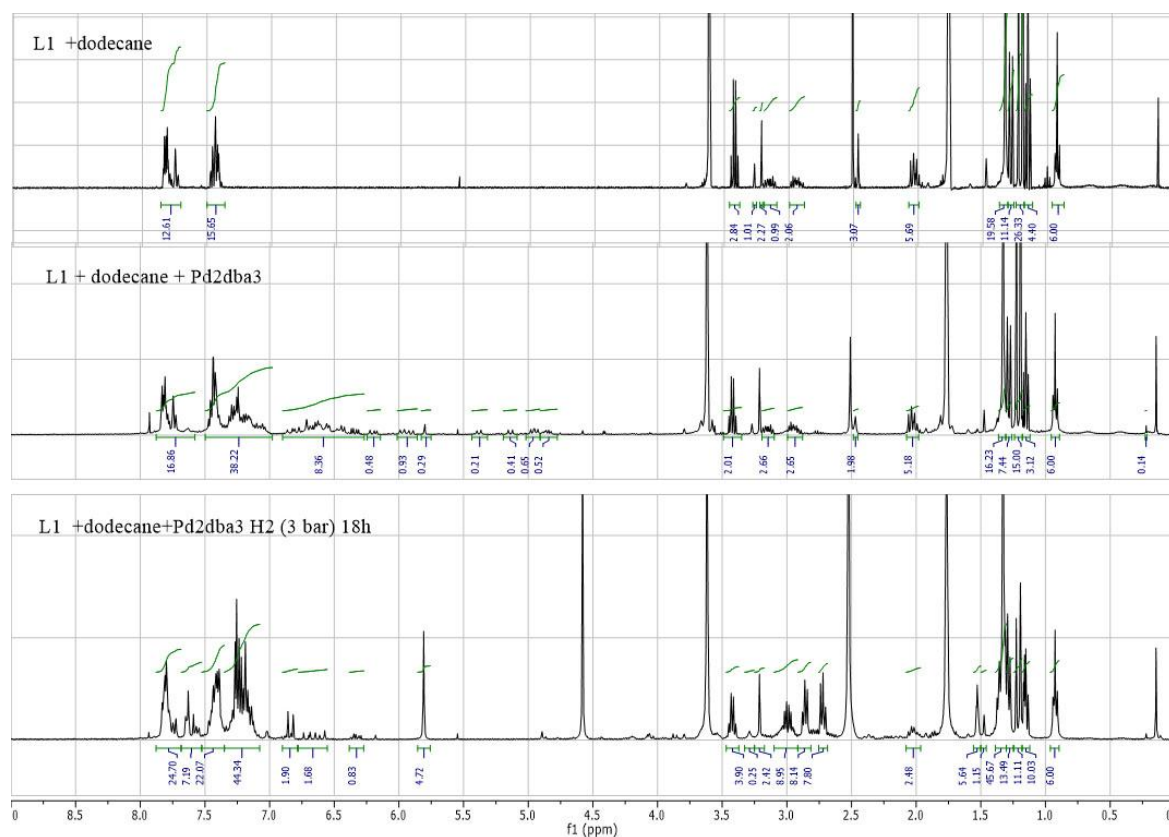

**Figure S2.**  $^1\text{H}$  NMR (400 MHz, solvent, 298 K) spectra corresponding to the monitoring of the formation of **PdL1**.

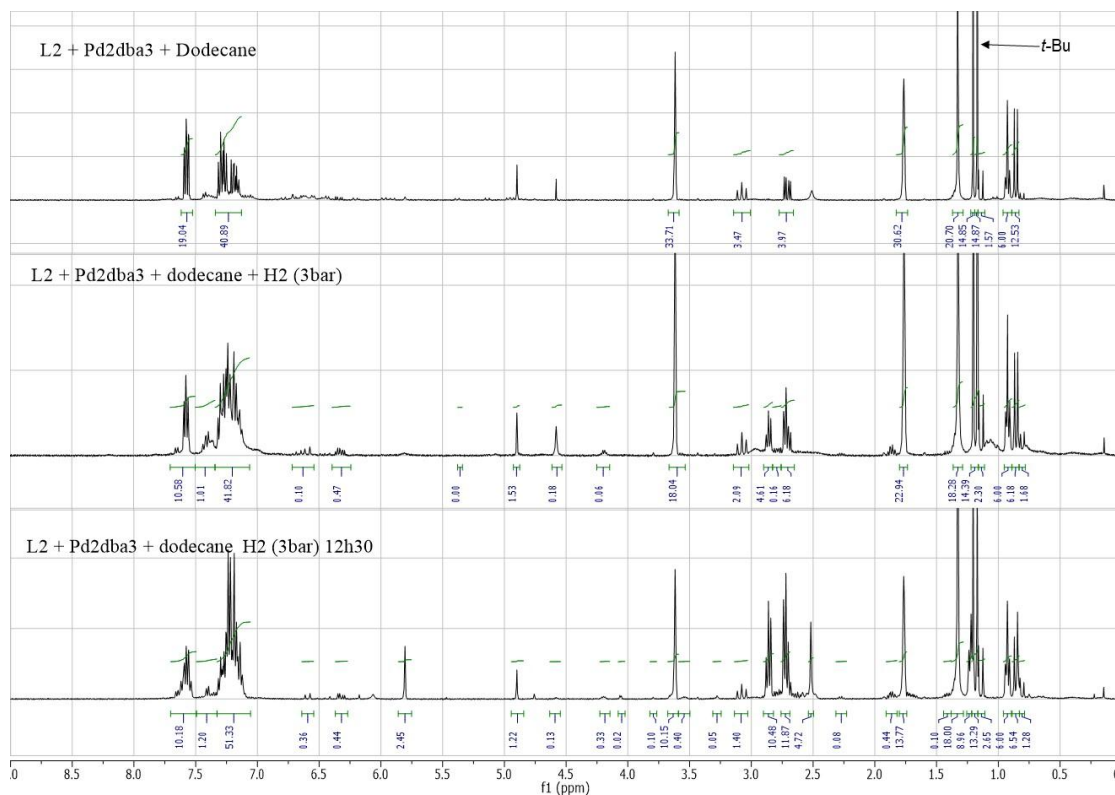

**Figure S3.**  $^1\text{H}$  NMR (400 MHz, solvent, 298 K) spectra corresponding to the monitoring of the formation of **PdL2**.

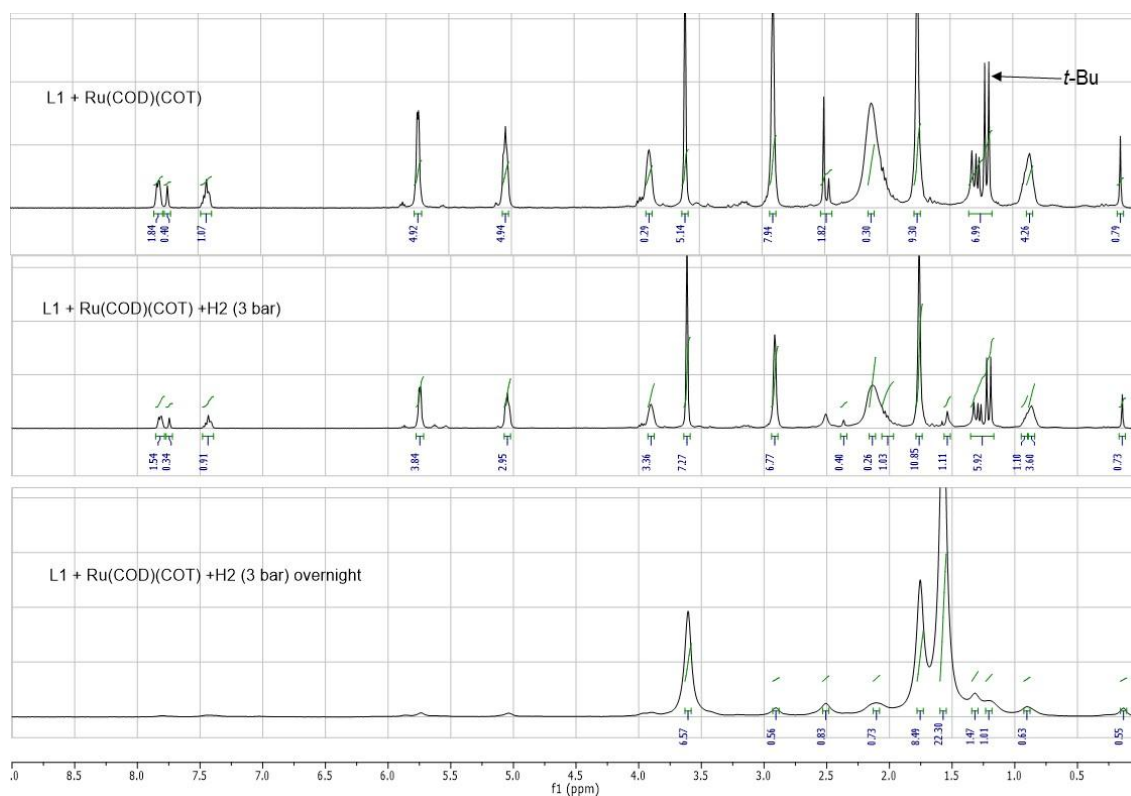

**Figure S4.**  $^1\text{H}$  NMR (400 MHz, solvent, 298 K) spectra corresponding to the monitoring of the formation of **RuL1**.

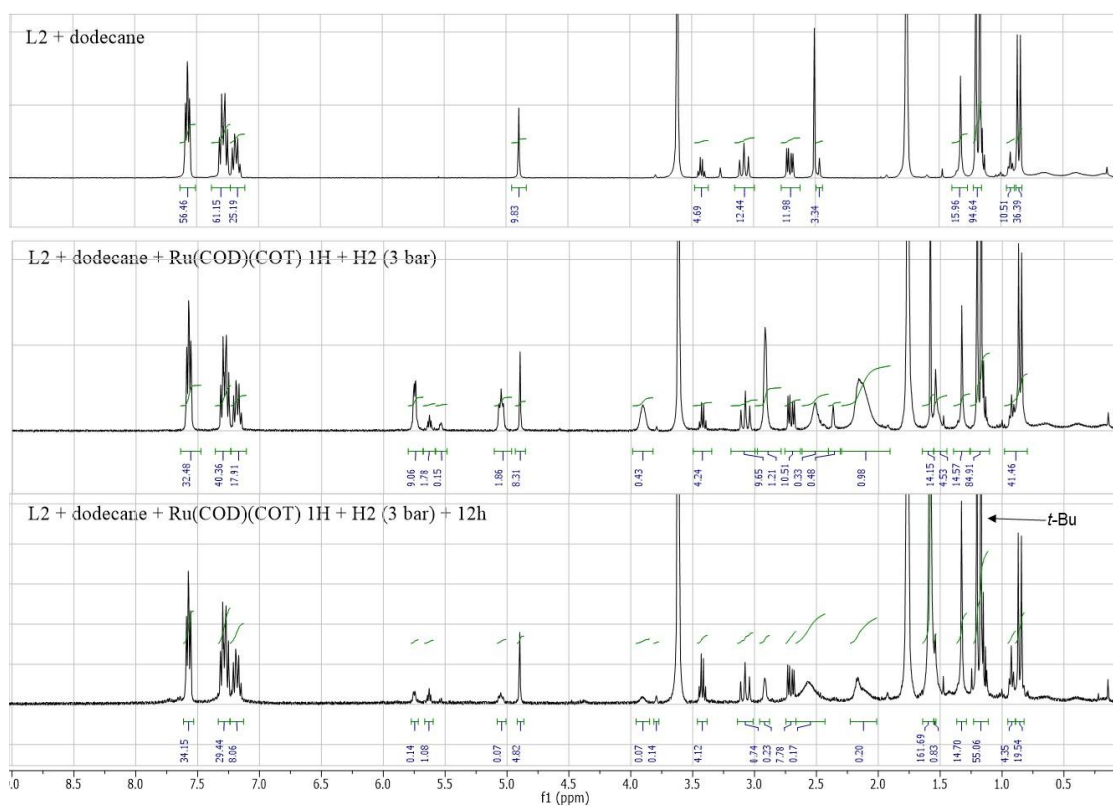

**Figure S5.**  $^1\text{H}$  NMR (400 MHz, solvent, 298 K) spectra corresponding to the monitoring of the formation of **RuL2**.

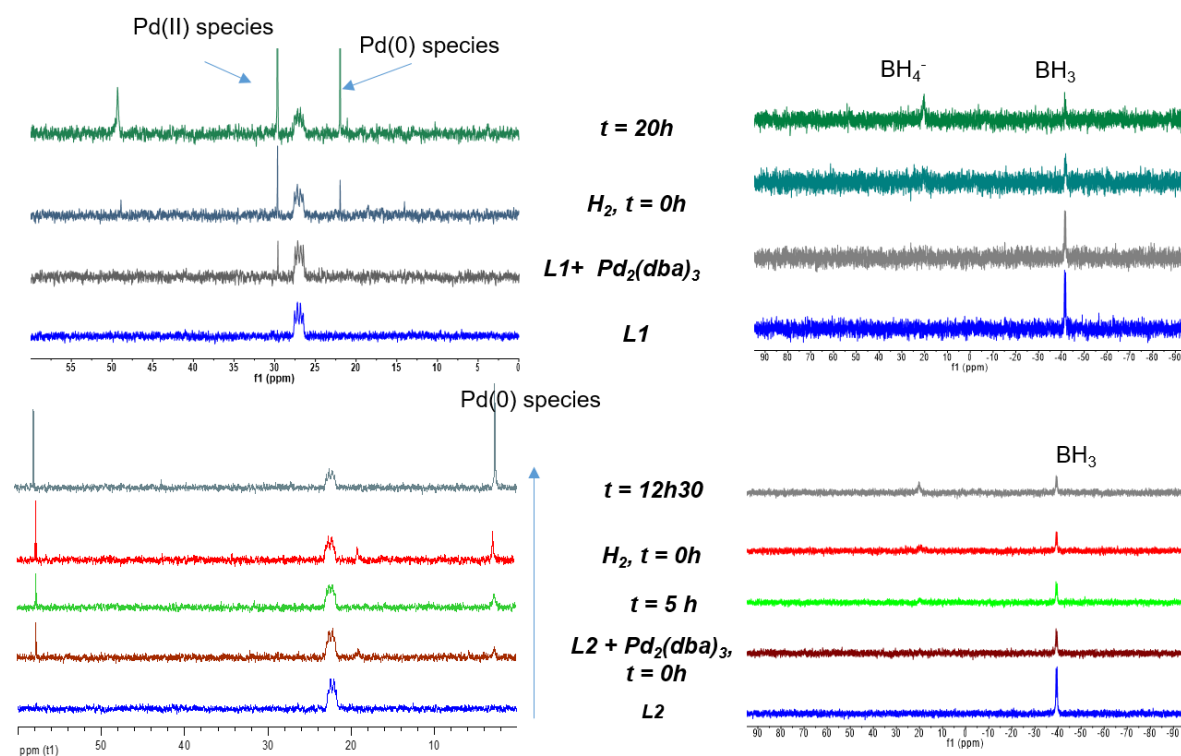

**Figure S6.**  $^{31}\text{P}$  (162 MHz, solvent, 298 K) and  $^{11}\text{B}$  (128 MHz, solvent, 298 K) NMR monitoring of the formation of PdL1 (top) and PdL2 (bottom).

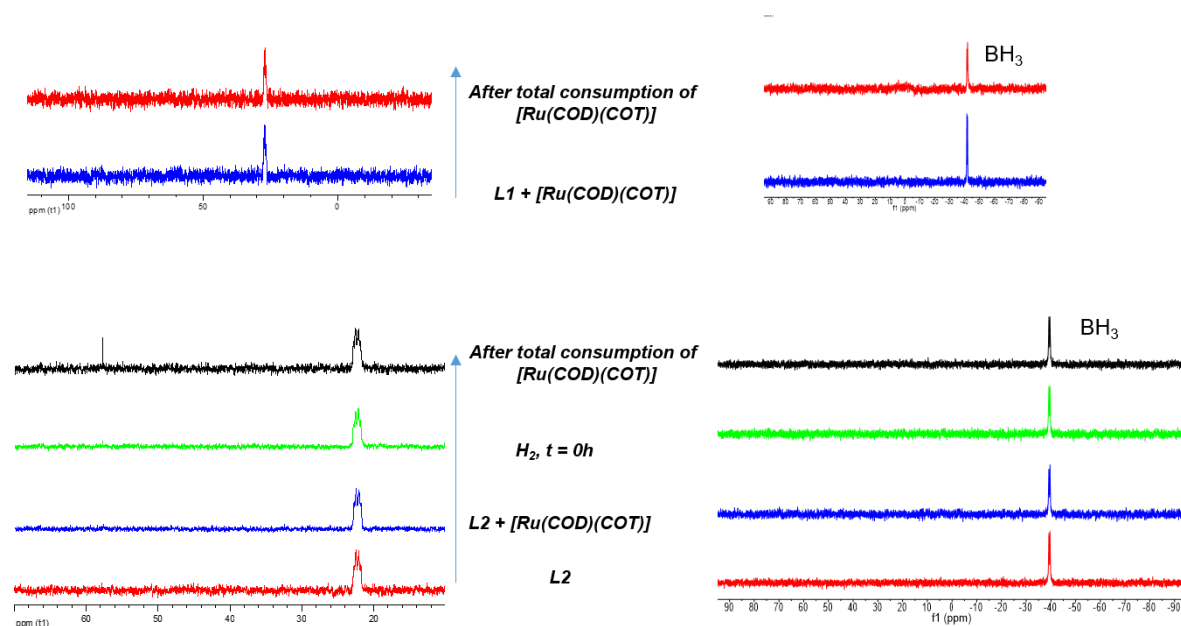

**Figure S7.**  $^{31}\text{P}$  (162 MHz, solvent, 298 K) and  $^{11}\text{B}$  (128 MHz, solvent, 298 K) NMR monitoring of the formation of RuL1 and RuL2.

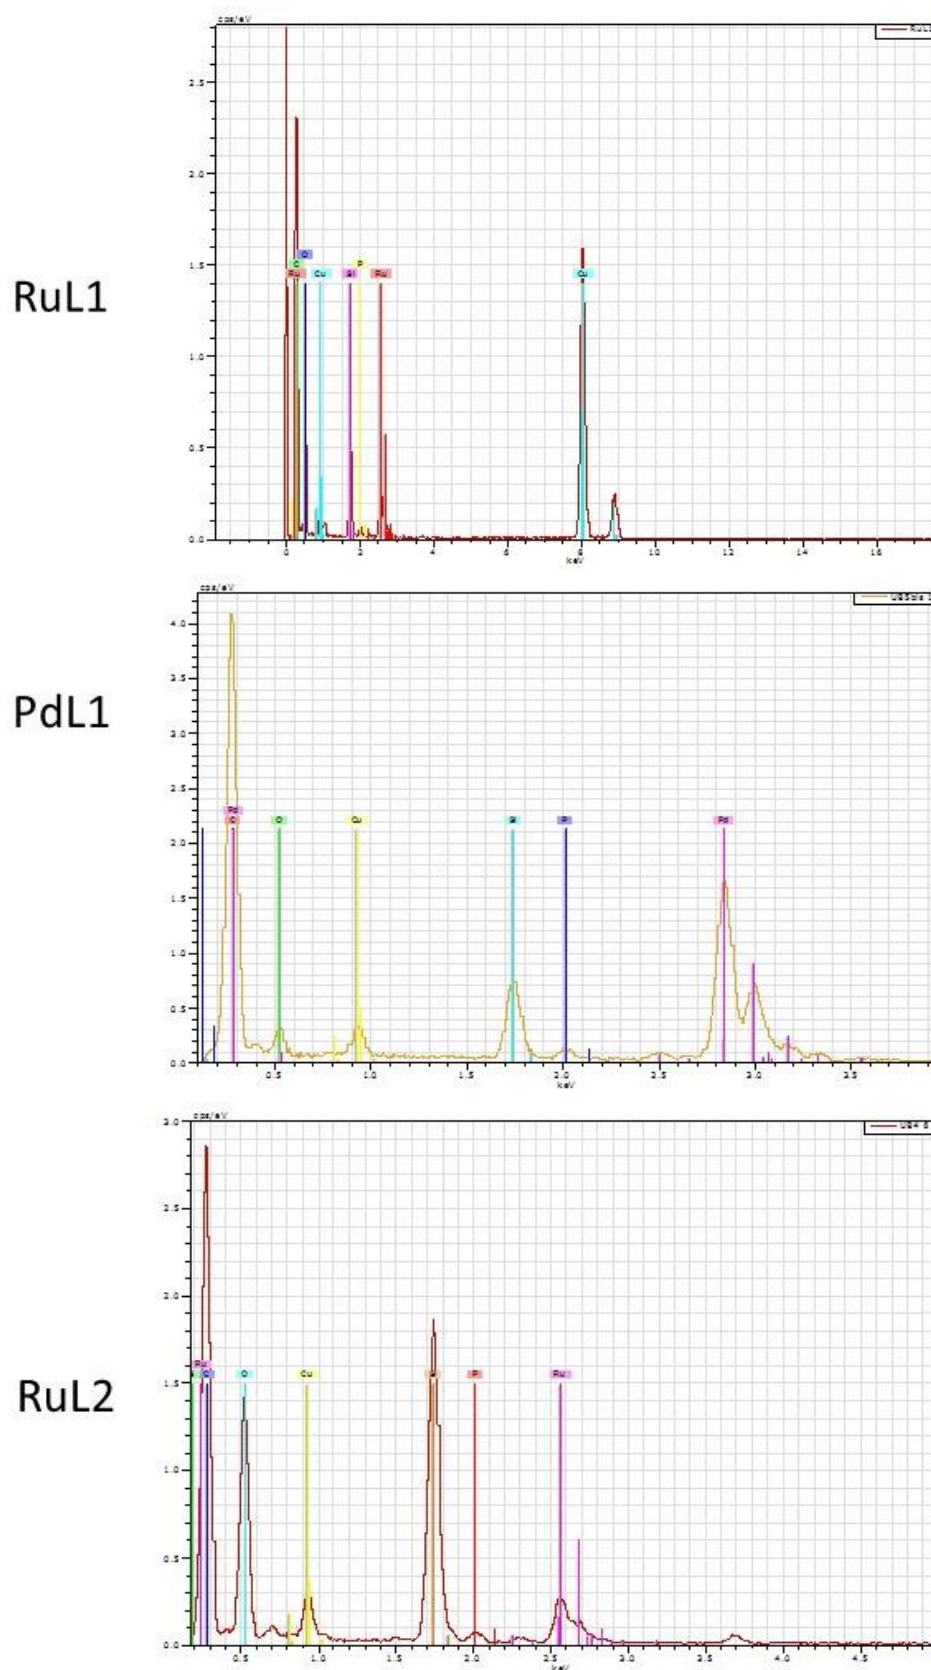

Figure S8. EDX (Energy Dispersive X-ray) analyses of PdL1, RuL1 and RuL2.

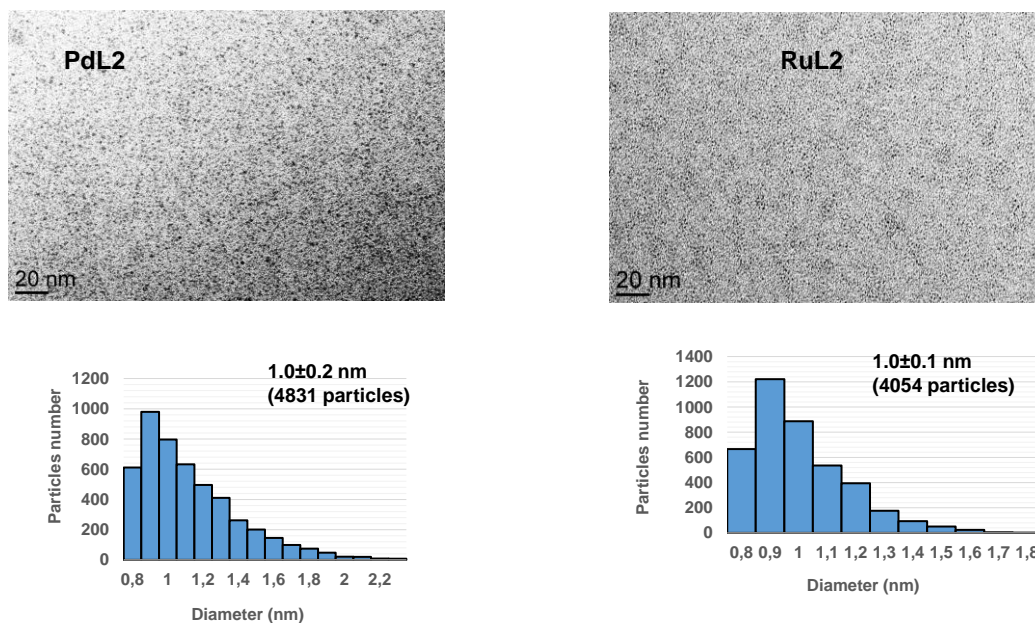

**Figure S9.** TEM (Transmission Electron Microscopy) images of PdL2 and RuL2 NPs stabilised with borane-free phosphine ligand, with the corresponding size distribution diagrams.

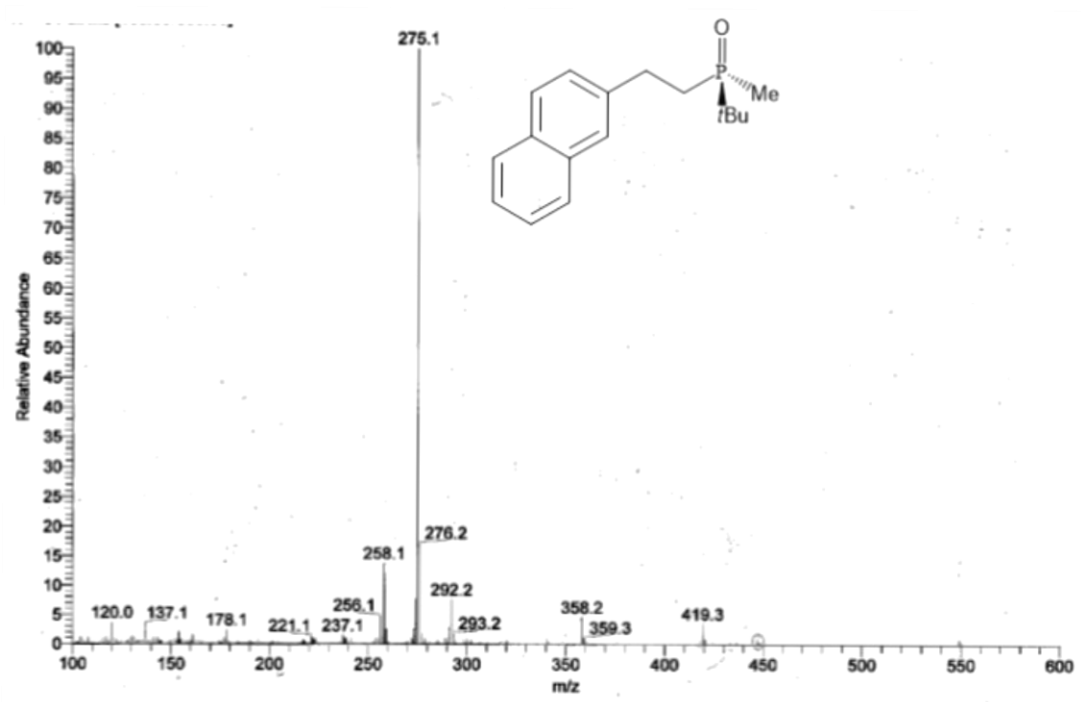

**Figure S10.** Cont.

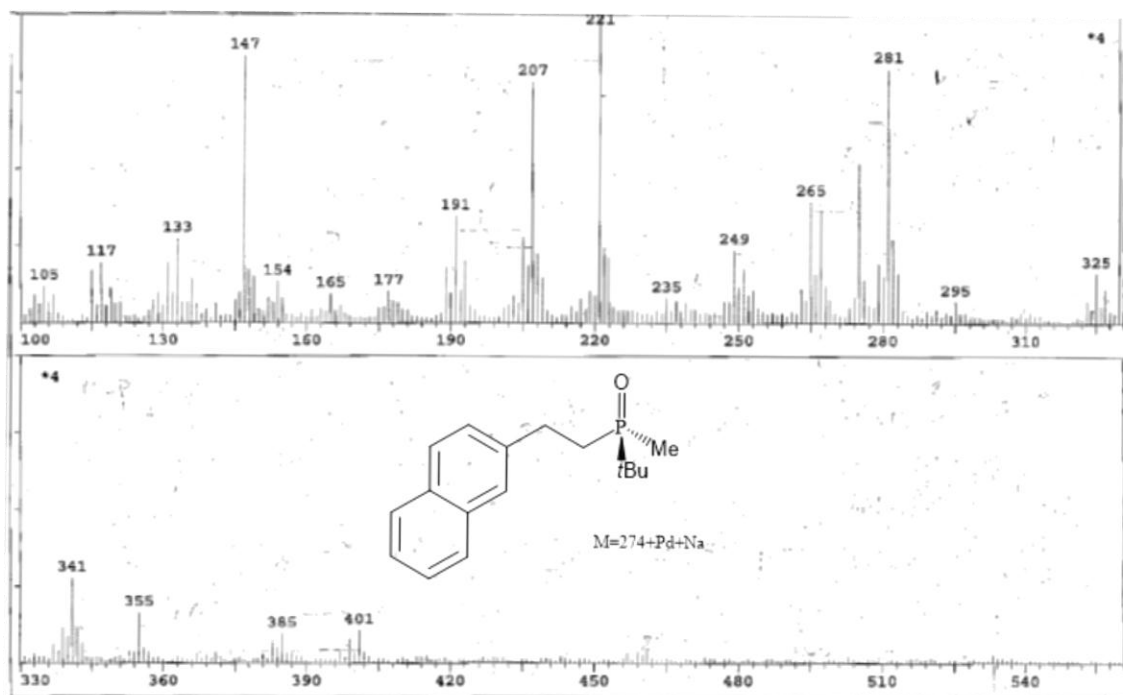

**Figure S10.** Mass spectrometry analyses of an organic phase of **PdL1** treated with H<sub>2</sub>O<sub>2</sub>(aq) and extracted with CH<sub>2</sub>Cl<sub>2</sub> (FAB (**bottom**) and DCI/NH<sub>3</sub> analyses (**top**)).

For **PdL1**, we observed a peak at 275.1 corresponding to the borane-free phosphine ( $M = 258$  g/mol) + NH<sub>3</sub> by DCI/NH<sub>3</sub> mass spectrometry and a peak at 401 corresponding to Pd(L1) + Na + O by FAB, which corresponds to the signal at +56 ppm in the <sup>31</sup>P NMR spectrum.

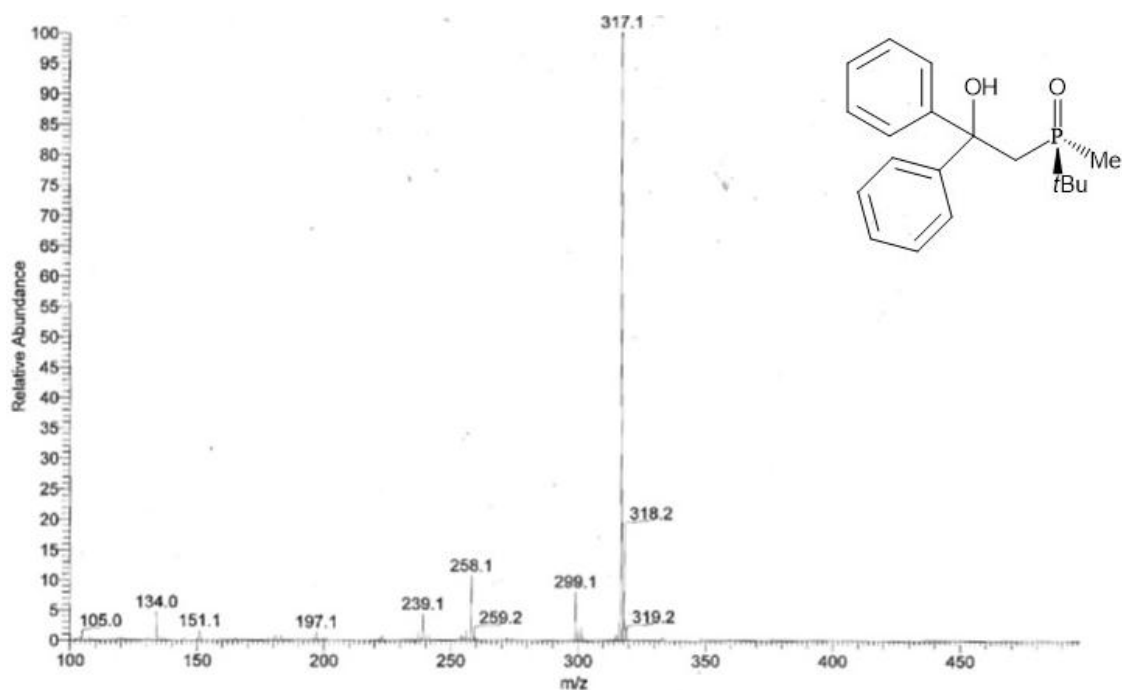

**Figure S11.** Cont.

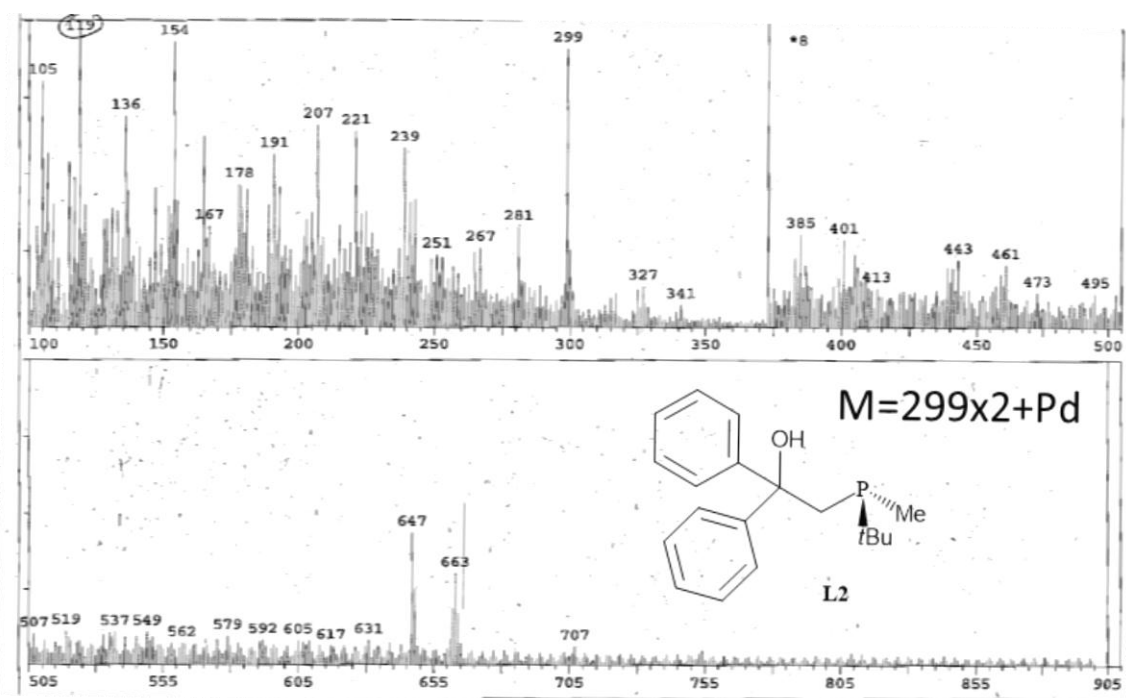

**Figure S11.** Mass spectrometry analyses of an organic phase of **PdL2** treated with  $\text{H}_2\text{O}_2(\text{aq})$  and extracted with  $\text{CH}_2\text{Cl}_2$  (FAB (**bottom**) and DCI/ $\text{NH}_3$  analyses(**top**)).

For **PdL2**, we observed a peak at 317.1 corresponding to the borane-free phosphine **L2** ( $M = 299$  g/mol) +  $\text{NH}_3$  by DCI/ $\text{NH}_3$  mass spectrometry and a peak at 707 corresponding to  $\text{Pd}(\text{L2})_2$  by FAB, which corresponds to the signal at +60 ppm in the  $^{31}\text{P}$  NMR spectrum.

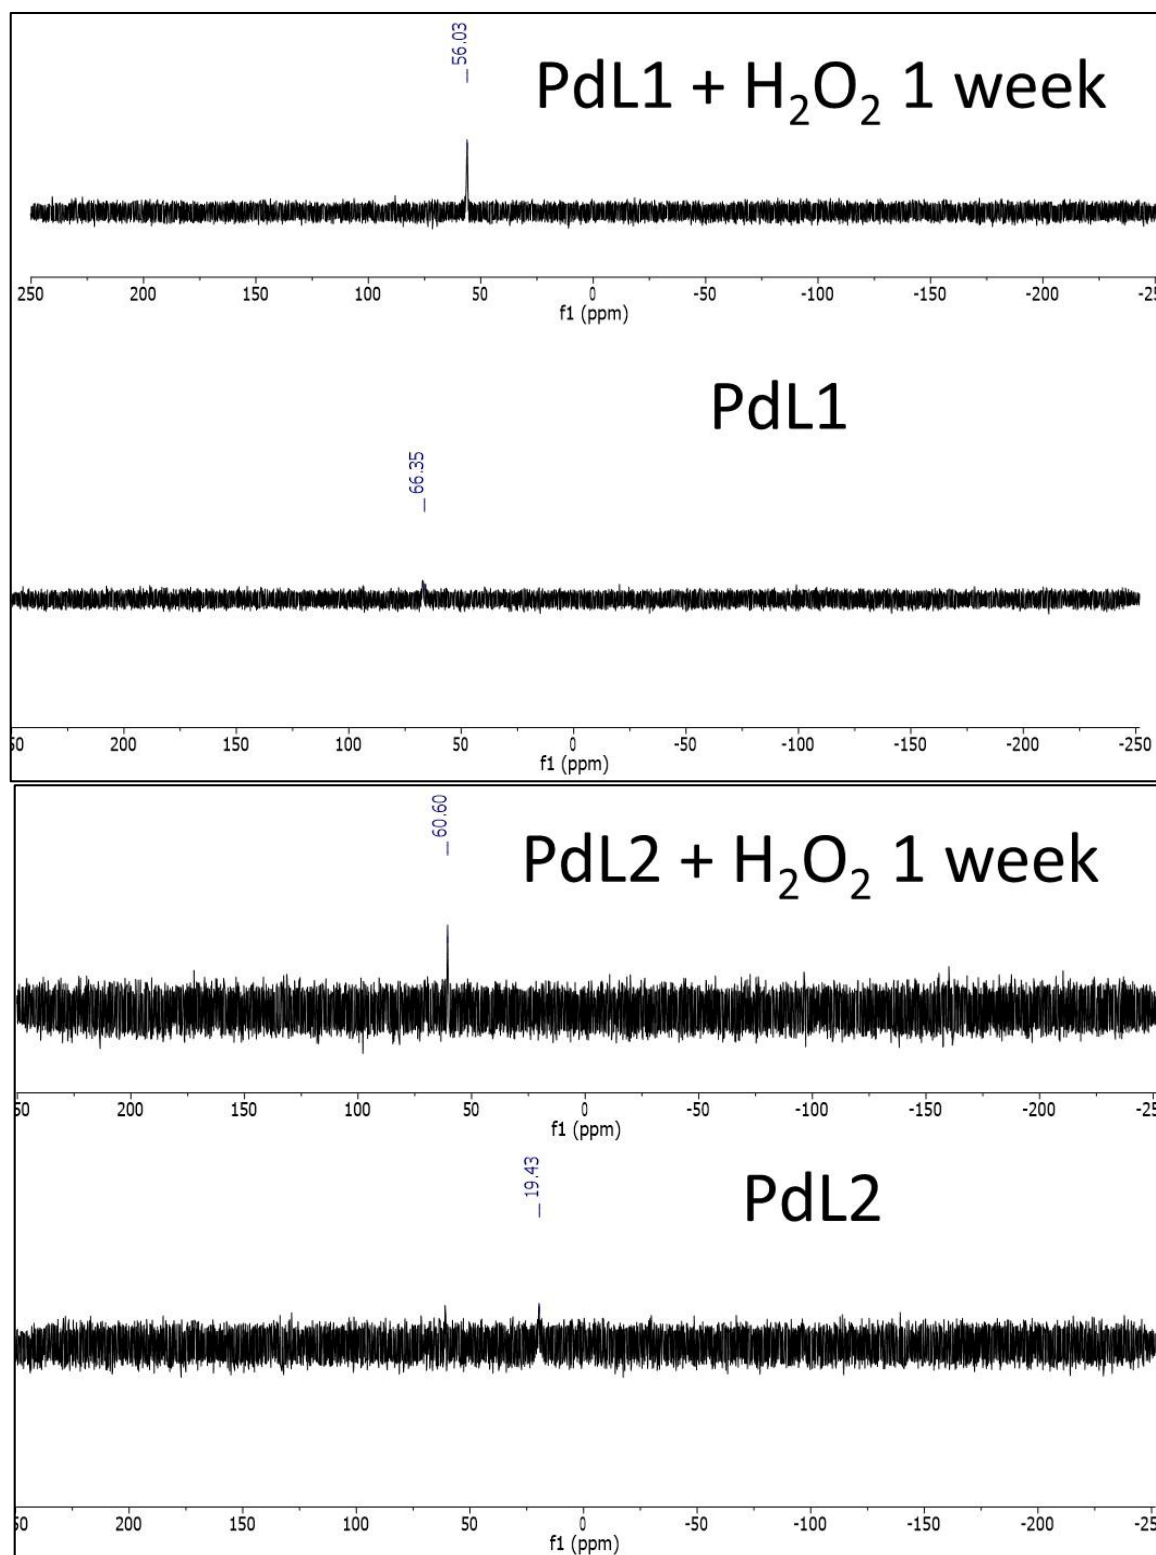

**Figure S12.**  $^{31}\text{P}$  NMR spectra in  $\text{CDCl}_3$  of PdNPs before and after addition of  $\text{H}_2\text{O}_2(\text{aq})$ .

**Table S1.** Hydrogenation of styrene and 4-vinylpyridine catalysed by **PdL** and **RuL** (**L** = **L1**, **L2**). <sup>1</sup>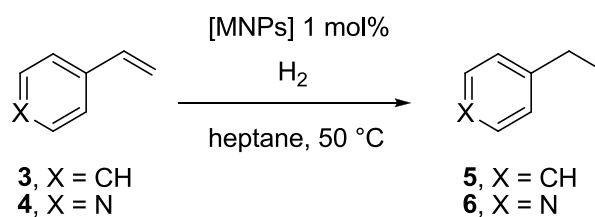

MNPs = **PdL1**, **PdL2**, **RuL1**, **RuL2**

| Entry | Catalyst       | Substrate | H <sub>2</sub> Pressure (bar) | Time (h) | Conversion (%) <sup>2</sup> |
|-------|----------------|-----------|-------------------------------|----------|-----------------------------|
| 1     | <b>PdL1</b>    | 3 or 4    | 3                             | 1        | 100                         |
| 2     | <b>PdL2</b>    | 3 or 4    | 3                             | 1        | 100                         |
| 3     | <b>RuL1</b>    | 3 or 4    | 3                             | 16       | 100                         |
| 4     | <b>RuL2</b>    | 3 or 4    | 3                             | 16       | 100                         |
| 5     | <b>RuL1</b>    | 3 or 4    | 20                            | 16       | 100                         |
| 6     | <b>RuL2</b>    | 3 or 4    | 20                            | 16       | 100                         |
| 7     | <b>RuL2</b>    | 3 or 4    | 40                            | 16       | 96 <sup>3</sup>             |
| 8     | [Ru(COD)(COT)] | 3         | 20                            | 16       | 100 (64/36) <sup>4</sup>    |

<sup>1</sup> Reaction conditions: to form the metal nanoparticles: 5 mg of [Pd<sub>2</sub>(dba)<sub>3</sub>] or 3 mg of [Ru(COD)(COT)] were mixed with 2 mg of ligand (**L1** or **L2**) in heptane at room temperature overnight under 3 bar of H<sub>2</sub>. Then 1 mmol of substrate (4-Vinylpyridine (105 mg) or styrene (104 mg)) with 142 mg of decane as internal standard were added. Then the reaction was run at 50 °C for 1 to 16h under 3–40 bar H<sub>2</sub>;

<sup>2</sup> Determined by GC using decane as internal standard; <sup>3</sup> <5% of ethylcyclohexane or ethylpiperidine;

<sup>4</sup> Mixture of ethylbenzene (64%) and ethylcyclohexane (36%).
